# Supplementary material for: Identification of Flap endonuclease 1 as a potential core gene in hepatocellular carcinoma by integrated bioinformatics analysis
Source: PeerJ. 2019 Sep 6;7:e7619. doi: 10.7717/peerj.7619 (PMC6733258; doi:10.7717/peerj.7619)
Supplement: Data S1 [file peerj-07-7619-s009.xlsx]

## Sheet: Sheet1
	Adjacent	Tumor
1	0.08897	0.10431
2	0.09611	0.12548
3	0.12696	0.11763
4	0.09159	0.1135
5	0.09336	0.10703
6	0.07903	0.16775
7	0.11354	0.15857
8	0.06344	0.15327
9	0.15243	0.2266
10	0.13245	0.19877
11	0.09344	0.14098
12	0.08353	0.08377
13	0.07689	0.09278
14	0.11469	0.13098
15	0.09755	0.19484
16	0.10346	0.07246
17	0.08342	0.09028
18	0.13342	0.24325
19	0.14336	0.21236
20	0.16984	0.19847
21	0.14228	0.17021
22	0.07839	0.14236
23	0.08238	0.13253
24	0.09266	0.08234
25	0.04903	0.09234
26	0.04089	0.10395
27	0.07729	0.11534
28	0.12529	0.21453
29	0.12909	0.23562
30	0.0879	0.18763
31	0.10325	0.23098
32	0.12124	0.14352
33	0.13536	0.15356
34	0.08232	0.1244
