# Supplementary material for: Identification of Flap endonuclease 1 as a potential core gene in hepatocellular carcinoma by integrated bioinformatics analysis
Source: PeerJ. 2019 Sep 6;7:e7619. doi: 10.7717/peerj.7619 (PMC6733258; doi:10.7717/peerj.7619)
Supplement: Data S2 [file peerj-07-7619-s010.xlsx]

## Sheet: Sheet1
	pairinfo	group	IHC score
1	1	cancer	243.85
2	1	para-cancer	144.44
3	2	cancer	268.68
4	2	para-cancer	256.8
5	3	cancer	221.63
6	3	para-cancer	194.64
7	4	cancer	215.68
8	4	para-cancer	211.68
9	5	cancer	210.58
10	5	para-cancer	189.9
11	6	cancer	237.22
12	6	para-cancer	203.97
13	7	cancer	195.13
14	7	para-cancer	183.16
15	8	cancer	230.44
16	8	para-cancer	226.08
17	9	cancer	231.67
18	9	para-cancer	208.39
19	10	cancer	197.1
20	10	para-cancer	171.64
21	11	cancer	225.99
22	11	para-cancer	173.83
23	12	cancer	158.07
24	12	para-cancer	138.68
25	13	cancer	166.82
26	13	para-cancer	161.63
27	14	cancer	194.64
28	14	para-cancer	185.68
29	15	cancer	212.08
30	15	para-cancer	171.38
31	16	cancer	146.08
32	16	para-cancer	180.3
33	17	cancer	246.26
34	17	para-cancer	205.13
35	18	cancer	215.85
36	18	para-cancer	175.44
37	19	cancer	208.18
38	19	para-cancer	187.8
39	20	cancer	211.88
40	20	para-cancer	194.64
41	21	cancer	252
42	21	para-cancer	211.68
43	22	cancer	181.58
44	22	para-cancer	160.89
45	23	cancer	207.32
46	23	para-cancer	180.97
47	24	cancer	216.13
48	24	para-cancer	192.16
49	25	cancer	209.76
50	25	para-cancer	186.18
51	26	cancer	217.67
52	26	para-cancer	185.39
53	27	cancer	186.1
54	27	para-cancer	158.64
55	28	cancer	182.99
56	28	para-cancer	155.83
57	29	cancer	208.07
58	29	para-cancer	183.68
59	30	cancer	136.82
60	30	para-cancer	115.63
61	31	cancer	155.44
62	31	para-cancer	119.68
63	32	cancer	207.08
64	32	para-cancer	158.38
65	33	cancer	136.08
66	33	para-cancer	160.3
67	34	cancer	253.46
68	34	para-cancer	201.73
