# Supplementary material for: Identification of Flap endonuclease 1 as a potential core gene in hepatocellular carcinoma by integrated bioinformatics analysis
Source: PeerJ. 2019 Sep 6;7:e7619. doi: 10.7717/peerj.7619 (PMC6733258; doi:10.7717/peerj.7619)
Supplement: Data S3 [file peerj-07-7619-s011.xlsx]

## Sheet: Sheet1
	Relative FEN1 expression (/GAPDH)
cell lines	HL7702	SK-HEP-1	MHCC97-H	HepG2	SMMC-7721	BEL-7404	HCCLM3	Huh7
	0.99066	1.18868	1.40532	1.89823	1.93055	2.37678	3.25431	3.59612
	1.06694	1.10654	1.13054	1.99536	1.87916	2.31352	3.35235	3.53043
	0.946096	0.909458	1.27001	1.99253	2.03692	2.50774	3.14154	3.82335
